# Supplementary material for: JMJD6 participates in the maintenance of ribosomal DNA integrity in response to DNA damage
Source: PLoS Genet. 2020 Jun 29;16(6):e1008511. doi: 10.1371/journal.pgen.1008511 (PMC7351224; doi:10.1371/journal.pgen.1008511)
Supplement: S11 Data — (XLSX) [file pgen.1008511.s024.xlsx]

## Sheet: Feuil1
	OHT
exp I	CAP positive cell	Total cell	%CAPS positive cell			siCtrl	siJMJD6-1	siJMJD6-2
siCtrl	128	313	40.8946		Manip I	40.8946	19.4872	23.5294
siJMJD6-1	38	195	19.4872		Manip II	39.3013	24.9027
siJMJD6-2	52	221	23.5294		Manip III	39.0698		26.9388
exp II					Manip IV	38.009	18.552	29.7398
siCtrl	90	229	39.3013		mean	39.3187	20.9806	26.736
siJMJD6-1	64	257	24.9027		sd	1.19175	3.42865	3.11014
siJMJD6-2					t test		0.0126118	0.0411505
exp III
siCtrl	84	215	39.0698
siJMJD6-1
siJMJD6-2	66	245	26.9388
exp IV
siCtrl	84	221	38.009
siJMJD6-1	41	221	18.552
siJMJD6-2	80	269	29.7398
